# Supplementary material for: Synthesis and properties of wax based on waste cooking oil
Source: Royal Society of Chemistry journal article supplement (doi:10.1039/d1ra08874b), 2022-01-01
Supplement: d1ra08874b1.pdf [file d1ra08874b1.pdf]

**Table S-1** The melting points of WCO-based waxes and other control samples.

| Sample | Initial melting<br>temperature/°C | Complete melting<br>temperature/°C |
|--------|-----------------------------------|------------------------------------|
| WCO    | 34                                | 37                                 |
| E-WCO  | 38                                | 41                                 |
| A1     | 41                                | 44                                 |
| A2     | 46                                | 49                                 |
| A3     | 54                                | 56                                 |
| SA     | 57                                | 58                                 |
| B1     | 35                                | 40                                 |
| B2     | 33                                | 38                                 |
| B3     | 34                                | 39                                 |
| CBS    | 46                                | 50                                 |
| SW     | 51                                | 54                                 |

**Table S-2** The Lovibond color codes of WCO-based waxes and other control samples.

| Sample | Y(Yellow) | R(Red) | B(Blue) | Light field | Dark field |
|--------|-----------|--------|---------|-------------|------------|
| WCO    | 51.1      | 24.3   | 2.1     | 0           | 0          |
| E-WCO  | 34.0      | 10     | 0       | 0.5         | 0          |
| A1     | 25.2      | 6      | 0       | 0           | 0.2        |
| A2     | 16.1      | 2.3    | 0       | 0           | 0.6        |
| A3     | 8.1       | 1.8    | 0       | 0           | 0.1        |
| SA     | 0.4       | 0.1    | 0       | 0           | 0          |
| B1     | 26.7      | 9      | 0       | 0           | 0          |
| B2     | 20        | 7.4    | 0       | 0           | 0          |
| B3     | 15        | 3.7    | 0       | 0           | 0          |
| CBS    | 3.4       | 0.3    | 0       | 0.4         | 0          |
| SW     | 12.1      | 0.7    | 0       | 0           | 0          |

**Table S-3** The penetration indexes of WCO-based waxes and other control samples.

| Sample | Penetration index /mm |
|--------|-----------------------|
| WCO    | -                     |
| E-WCO  | 22.68±0.33            |
| A1     | 5.67±0.16             |
| A2     | 2.95±0.15             |
| A3     | 1.53±0.12             |
| SA     | 0.28±0.0025           |
| B1     | 30.82±0.87            |
| B2     | 31.38±0.30            |
| B3     | 27.03±0.99            |
| CBS    | 15.42±0.58            |
| SW     | 5.46±0.12             |

**Table S-4** The combustion times of WCO-based waxes and other control samples.

| Sample | Combustion time /min |
|--------|----------------------|
| WCO    | -                    |
| E-WCO  | 42±4                 |
| A1     | 169±5                |
| A2     | 227±8                |
| A3     | 335±10               |
| SA     | 615±13               |
| B1     | 90±4                 |
| B2     | 49±5                 |
| B3     | 83±6                 |
| CBS    | 103±7                |
| SW     | 276±9                |

**Table S-5** The moisture contents of WCO-based waxes and other control samples.

| Sample | Moisture content / wt% |
|--------|------------------------|
| WCO    | 0.34                   |
| E-WCO  | 0.43                   |
| A1     | 0.40                   |
| A2     | 0.36                   |
| A3     | 0.28                   |
| SA     | 0.50                   |
| B1     | 0.32                   |
| B2     | 0.34                   |
| B3     | 0.40                   |
| CBS    | 0.32                   |
| SW     | 0.51                   |

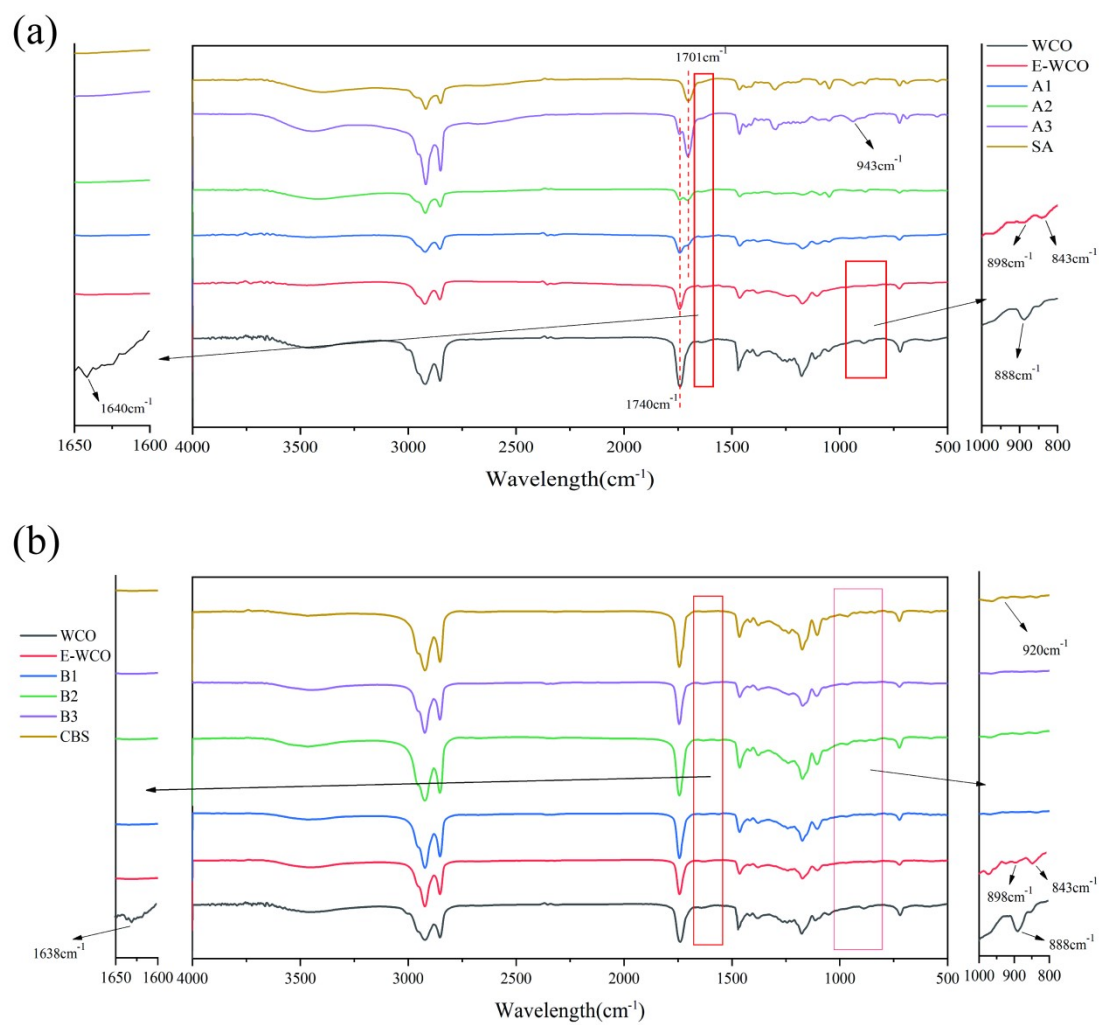

**Fig. S-1** IR spectra of WCO-based waxes and other control samples.

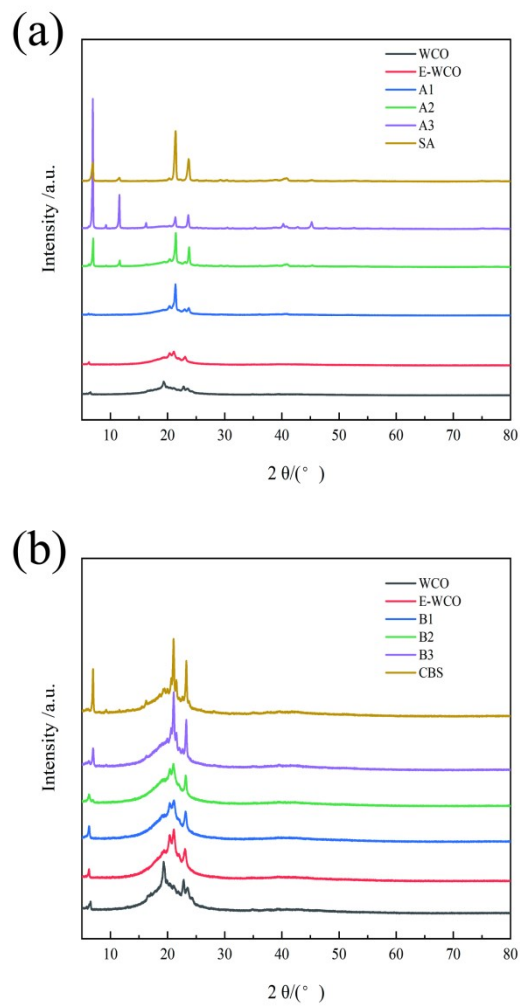

**Fig. S-2** PXR D patterns of WCO-based waxes and other control samples.
